# Supplementary material for: Exploring the Diversity and Biotechnological Potential of Cultured and Uncultured Coral-Associated Bacteria
Source: MDPI journal article supplement (doi:10.3390/microorganisms9112235), 2021-10-27
Supplement: s1 [file s1]

SUPPLEMENTARY MATERIAL

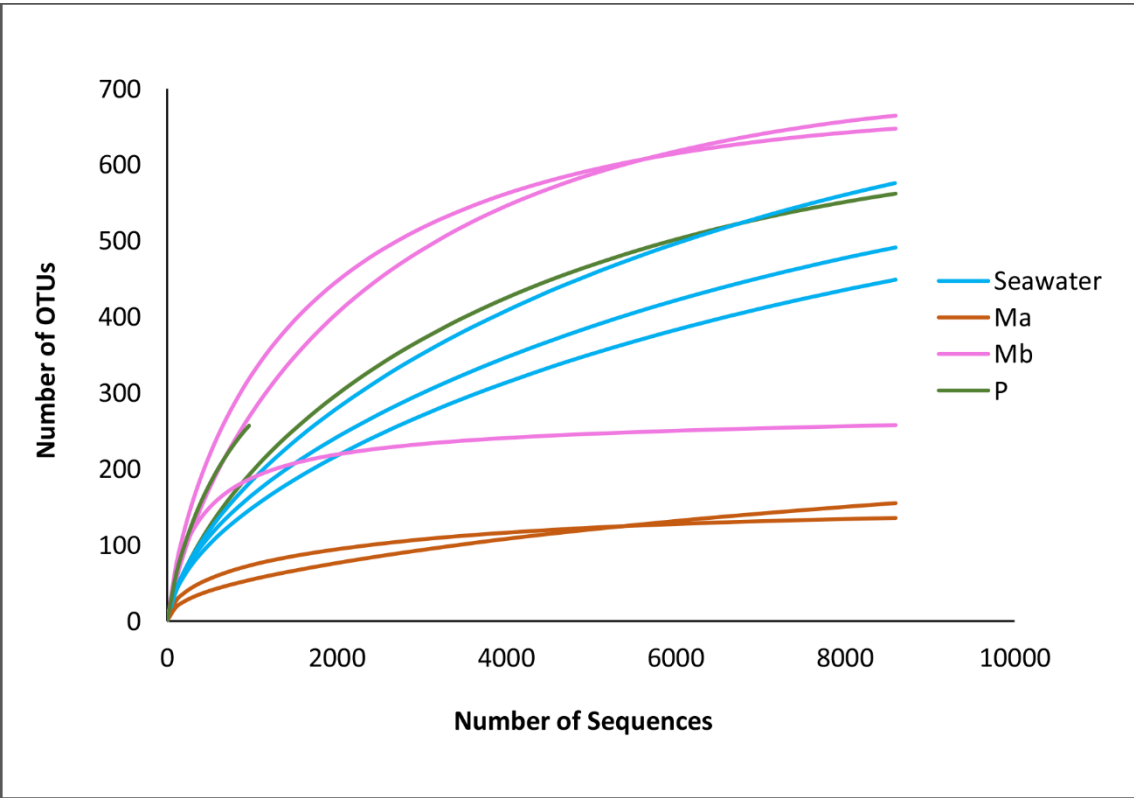

**Figure S1.** Rarefaction curves of 16S rRNA sequences obtained by Illumina sequencing from seawater, *Millepora alcicornis* (Ma), *Mussismilia braziliensis* (Mb), and *Porites astreoides* (P). Each colored line represents the OTUs of the samples.

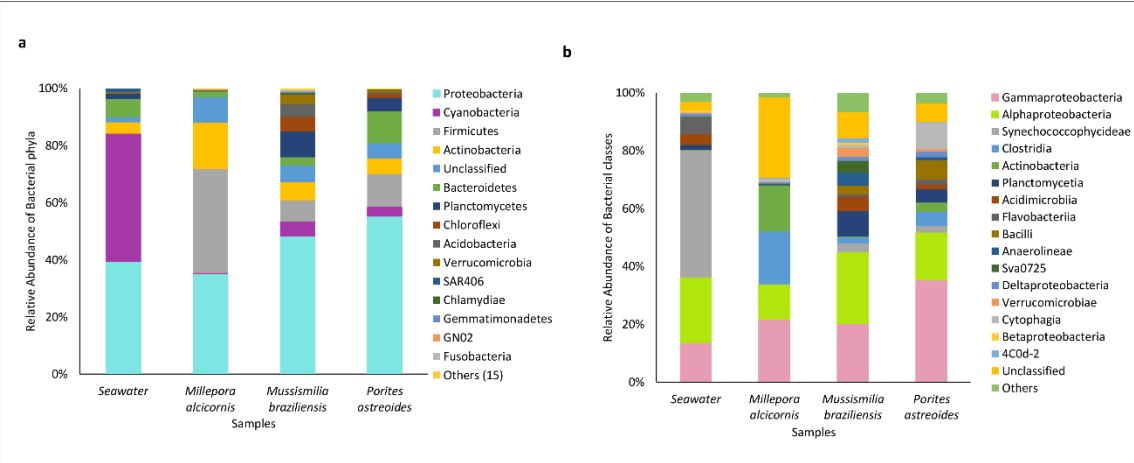

**Figure S2. (a)** Taxonomic classification and relative abundance of the bacterial phyla from seawater, *Millepora alcicornis*, *Mussismilia braziliensis*, and *Porites astreoides*. **(b)** Taxonomic classification and relative abundance of the bacterial classes from seawater, *Millepora alcicornis*, *Mussismilia braziliensis*, and *Porites astreoides*. The classifications were based on the Greengenes database, employing an 80% confidence threshold.

**Table S1.**  $\alpha$ -diversity indexes of the samples from seawater (n = 3) and the corals *Millepora alcicornis* (n = 2), *Mussismilia braziliensis* (n = 3), and *Porites astreoides* (n = 3).

| Samples                         | No of OTUs* | Chao1* | Shannon* |
|---------------------------------|-------------|--------|----------|
| Seawater                        | 163         | 361    | 3.31     |
| <i>Millepora alcicornis</i>     | 63          | 108    | 2.48     |
| <i>Mussismilia braziliensis</i> | 257         | 436    | 4.59     |
| <i>Porites astreoides</i>       | 224         | 396    | 3.99     |

\* Mean value of 3 replicates for seawater and *M. braziliensis*, and 2 replicates for *M. alcicornis* and *P. astreoides*.

**Table S2.** Hydrolysis index of enzyme production for lipase, keratinase, caseinase, amylase, chitinase, cellulase, and gelatinase by microorganisms isolated from the corals *Millepora alcicornis* (Ma), *Mussismilia braziliensis* (Mb), and *Porites astreoides* (P).

| Enzyme           | Isolate             | Hydrolysis index                | Identity                          | Similarity |
|------------------|---------------------|---------------------------------|-----------------------------------|------------|
| <b>Lipase</b>    |                     | <i>Millepora alcicornis</i>     |                                   |            |
|                  | 1-Ma                | 1.26                            | <i>Bacillus</i> sp.               | 99%        |
|                  | 2-Ma                | 1.20                            | <i>Pseudomonas stutzeri</i>       | 99%        |
|                  | 3-Ma                | 1.13                            | <i>Acinetobacter beijerinckii</i> | 99%        |
|                  | 4-Ma                | 1.38                            | <i>Virgibacillus halophilus</i>   | 99%        |
|                  | Lipase mean (Ma)    | 1.24                            |                                   |            |
|                  |                     | <i>Mussismilia braziliensis</i> |                                   |            |
|                  | 11-Mb               | 1.29                            | <i>Staphylococcus</i> sp.         | 99%        |
|                  | 24-Mb               | 1.11                            | <i>Exiguobacterium profundum</i>  | 97%        |
|                  | 28-Mb               | 1.43                            | <i>Staphylococcus</i> sp.         | 99%        |
|                  | 29-Mb               | 1.91                            | <i>Staphylococcus</i> sp.         | 99%        |
|                  | Lipase mean (Mb)    | 1.43                            |                                   |            |
|                  |                     | <i>Porites astreoides</i>       |                                   |            |
|                  | 21-P                | 1.07                            | <i>Bacillus amyloliquefaciens</i> | 99%        |
|                  | 36-P                | 1.13                            | <i>Psychrobacter celer</i>        | 98%        |
|                  | 38-P                | 1.25                            | <i>Pseudomonas stutzeri</i>       | 97%        |
|                  | Lipase mean (P)     | 1.15                            |                                   |            |
| <b>Caseinase</b> |                     | <i>Millepora alcicornis</i>     |                                   |            |
|                  | 1-Ma                | 1.50                            | <i>Bacillus</i> sp.               | 99%        |
|                  | 3-Ma                | 1.36                            | <i>Acinetobacter beijerinckii</i> | 99%        |
|                  | 5-Ma                | 1.15                            | <i>Raoultella ornithinolytica</i> | 99%        |
|                  | 14-Ma               | 1.25                            | <i>Cellulomonas</i> sp.           | 99%        |
|                  | Caseinase mean (Ma) | 1.25                            |                                   |            |
|                  |                     | <i>Mussismilia braziliensis</i> |                                   |            |
|                  | 12-Mb               | 1.50                            | <i>Micrococcus luteus</i>         | 97%        |
|                  | 18-Mb               | 1.38                            | <i>Exiguobacterium profundum</i>  | 99%        |
|                  | 19-Mb               | 1.38                            | <i>Exiguobacterium profundum</i>  | 99%        |
|                  | 23-Mb               | 1.25                            | <i>Exiguobacterium</i> sp.        | 96%        |
|                  | 24-Mb               | 1.58                            | <i>Exiguobacterium profundum</i>  | 97%        |
|                  | 25-Mb               | 1.25                            | <i>Exiguobacterium profundum</i>  | 99%        |
|                  | Caseinase mean (Mb) | 1.39                            |                                   |            |
|                  |                     | <i>Porites astreoides</i>       |                                   |            |
|                  | 21-P                | 1.65                            | <i>Bacillus amyloliquefaciens</i> | 99%        |
|                  | 22-P                | 1.63                            | <i>Microbacterium</i> sp.         | 98%        |
|                  | 36-P                | 1.38                            | <i>Psychrobacter celer</i>        | 98%        |
|                  | 38-P                | 1.22                            | <i>Pseudomonas stutzeri</i>       | 97%        |
|                  | 39-P                | 1.38                            | <i>Exiguobacterium profundum</i>  | 99%        |
|                  | 40-P                | 1.43                            | <i>Exiguobacterium profundum</i>  | 99%        |
|                  | Caseinase mean (P)  | 1.42                            |                                   |            |
| <b>Amylase</b>   |                     | <i>Millepora alcicornis</i>     |                                   |            |
|                  | 1-Ma                | 1.33                            | <i>Bacillus</i> sp.               | 99%        |
|                  | 2-Ma                | 1.50                            | <i>Pseudomonas stutzeri</i>       | 99%        |
|                  | 35-Ma               | 1.20                            | <i>Bacillus cereus</i>            | 99%        |
|                  | Amylase mean (Ma)   | 1.34                            |                                   |            |
|                  |                     | <i>Mussismilia braziliensis</i> |                                   |            |
|                  |                     | ND                              |                                   |            |
|                  |                     | <i>Porites astreoides</i>       |                                   |            |
|                  | 21-P                | 1.21                            | <i>Bacillus amyloliquefaciens</i> | 99%        |
|                  | 36-P                | 1.33                            | <i>Psychrobacter celer</i>        | 98%        |
|                  | 38-P                | 2.00                            | <i>Pseudomonas stutzeri</i>       | 97%        |
|                  | Amylase mean (P)    | 1.51                            |                                   |            |
|                  |                     | <i>Millepora alcicornis</i>     |                                   |            |
|                  | 1-Ma                | 1.35                            | <i>Bacillus</i> sp.               | 99%        |
|                  | 14-Ma               | 1.86                            | <i>Cellulomonas</i> sp.           | 99%        |
|                  | 35-Ma               | 1.38                            | <i>Bacillus cereus</i>            | 99%        |
|                  | Chitinase mean (Ma) | 1.53                            |                                   |            |
|                  |                     | <i>Mussismilia braziliensis</i> |                                   |            |
|                  |                     | ND                              |                                   |            |
|                  |                     | <i>Porites astreoides</i>       |                                   |            |
|                  | 21-P                | 2.00                            | <i>Bacillus amyloliquefaciens</i> | 99%        |
|                  | 22-P                | 2.14                            | <i>Microbacterium</i> sp.         | 98%        |
|                  | Chitinase mean (P)  | 2.07                            |                                   |            |
| <b>Cellulase</b> |                     | <i>Millepora alcicornis</i>     |                                   |            |
|                  | 1-Ma                | 1.58                            | <i>Bacillus</i> sp.               | 99%        |
|                  | 2-Ma                | 1.38                            | <i>Pseudomonas stutzeri</i>       | 99%        |
|                  | Cellulase mean (Ma) | 1.48                            |                                   |            |
|                  |                     | <i>Mussismilia braziliensis</i> |                                   |            |
|                  | 23-Mb               | 1.27                            | <i>Exiguobacterium</i> sp.        | 96%        |
|                  | 24-Mb               | 1.60                            | <i>Exiguobacterium profundum</i>  | 97%        |
|                  | Cellulase mean (Mb) | 1.43                            |                                   |            |
|                  |                     | <i>Porites astreoides</i>       |                                   |            |
|                  | 21-P                | 1.60                            | <i>Bacillus amyloliquefaciens</i> | 99%        |

|                      |       |                                 |                                   |     |
|----------------------|-------|---------------------------------|-----------------------------------|-----|
| Cellulase mean (P)   |       | 1.60                            |                                   |     |
| <b>Gelatinase</b>    |       | <i>Millepora alcornis</i>       |                                   |     |
|                      | 3-Ma  | 2.11                            | <i>Acinetobacter beijerinckii</i> | 99% |
| Gelatinase mean (Ma) |       | 2.11                            |                                   |     |
|                      |       | <i>Mussismilia braziliensis</i> |                                   |     |
|                      | 12-Mb | 2.00                            | <i>Micrococcus luteus</i>         | 97% |
|                      | 24-Mb | 1.23                            | <i>Exiguobacterium profundum</i>  | 97% |
| Gelatinase mean (Mb) |       | 1.61                            |                                   |     |
|                      |       | <i>Porites astreoides</i>       |                                   |     |
|                      | 21-P  | 1.25                            | <i>Bacillus amyloliquefaciens</i> | 99% |
